# Supplementary material for: Anterior cingulate cortex regulates pain catastrophizing-like behaviors in rats
Source: Springer Nature journal article supplement (doi:10.1186/s13041-023-01060-8), 2023-10-13
Supplement: MOESM1 [file 13041_2023_1060_MOESM1_ESM.pdf]

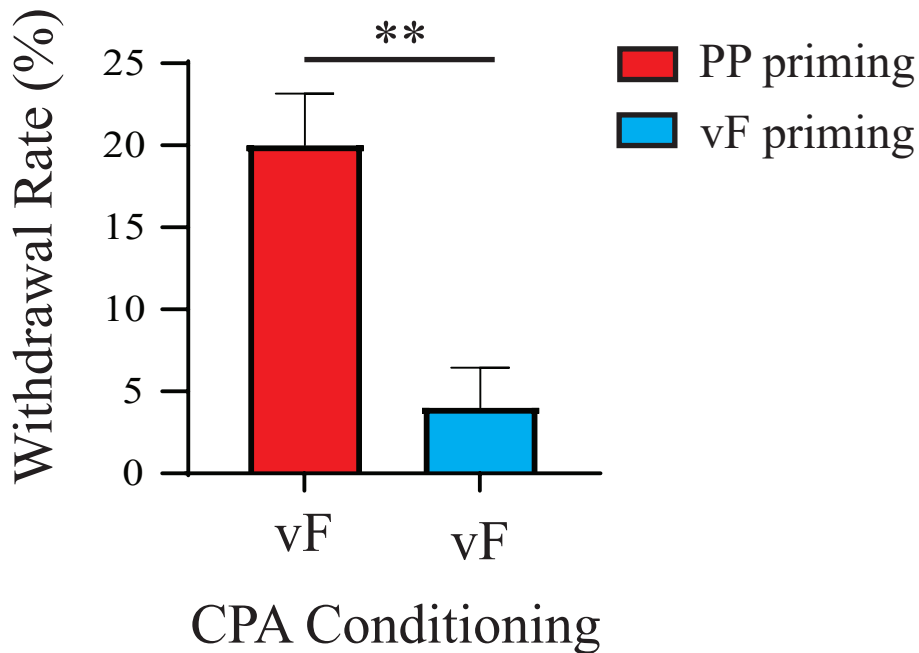

**Additional file 1: Fig. S1. Peripheral sensitivity to non-noxious stimuli is observed after priming with noxious stimuli.** After priming with a noxious stimulus (pin prick, or PP), rats withdrew their opposite paws to the non-noxious stimulus (vF) at a rate that is substantially higher than control rats (\*\* $p < 0.01$ , paired t test;  $n = 5$  animals).
